# Supplementary material for: Elevation of Trimethylamine-N-Oxide in Chronic Kidney Disease: Contribution of Decreased Glomerular Filtration Rate
Source: MDPI journal article supplement (doi:10.3390/toxins11110635), 2019-11-01
Supplement: s1 [file s1]

## Supplementary Materials: Elevation of Trimethylamine-N-Oxide in Chronic Kidney Disease: Contribution of Decreased Glomerular Filtration Rate

Caroline C. Pelletier, Mikael Croyal, Lavinia Ene, Audrey Aguesse, Stephanie Billon-Crossouard, Michel Krempf, Sandrine Lemoine, Fitsum Guebre-Egziabher, Laurent Juillard and

Christophe O. Soulage

**Table S1.** Multiple Reaction Monitoring (MRM) parameters used for LC-MS/MS analysis.

| Compounds                                                         | MRM ( <i>m/z</i> ) | Cone Voltage (V) | Collision Energy (eV) |
|-------------------------------------------------------------------|--------------------|------------------|-----------------------|
| TMAO                                                              | 75.9 → 58.9        | 20               | 11                    |
| <sup>2</sup> H <sub>9</sub> -TMAO                                 | 85.0 → 68.0        | 20               | 11                    |
| Derivatized TMA                                                   | 174.1 → 118.0      | 25               | 10                    |
| Derivatized [ <sup>13</sup> C <sub>3</sub> , <sup>15</sup> N]-TMA | 178.1 → 122.0      | 25               | 10                    |
| Betaine                                                           | 118.1 → 58.1       | 40               | 22                    |
| <sup>13</sup> C <sub>2</sub> -betaine                             | 120.1 → 58.1       | 40               | 22                    |
| Choline                                                           | 104.1 → 60.1       | 40               | 15                    |
| <sup>2</sup> H <sub>9</sub> -choline                              | 113.2 → 69.1       | 40               | 15                    |
| Carnitine                                                         | 162.1 → 103.0      | 25               | 14                    |
| <sup>2</sup> H <sub>9</sub> -carnitine                            | 171.1 → 69.1       | 25               | 14                    |

**Table S2.** Baseline characteristics of Control subjects and CKD patients who performed TMAO clearance.

| Variable                        | Controls                        | CKD Patients                  |                               | <i>p</i> -Value |
|---------------------------------|---------------------------------|-------------------------------|-------------------------------|-----------------|
|                                 |                                 | Stage 1–2                     | Stage 3–5                     |                 |
| N                               | 5                               | 19                            | 8                             |                 |
| Sex, male/female                | 2/3                             | 12/7                          | 3/5                           | 0.387           |
| Age, y                          | 44 [34–50]                      | 37 [23–57]                    | 57 [23–69]                    | 0.508           |
| BMI, kg/m <sup>2</sup>          | 22.4 [19.8–27.3]                | 23.7 [21.7–26.0]              | 23.5 [21.6–29.1]              | 0.852           |
| Systolic Blood Pressure, mmHg   | 109 [96–146]                    | 113 [105–130]                 | 117 [101–135]                 | 0.782           |
| Diastolic Blood Pressure, mmHg  | 73 [61–89]                      | 72 [64–81]                    | 68 [59–77]                    | 0.735           |
| Heart Rate, bpm                 | 74 [61–79]                      | 62 [57–70]                    | 66 [57–75]                    | 0.434           |
| Creatinine, μmol/L              | 72 [62–82] <sup>a</sup>         | 94 [84–109] <sup>a,b</sup>    | 123 [96–151] <sup>b</sup>     | 0.001           |
| mGFR, mL/min/1.73m <sup>2</sup> | 98 [91–105] <sup>a</sup>        | 73 [67–79] <sup>b</sup>       | 51 [46–55] <sup>c</sup>       | <0.0001         |
| Urea, mmol/L                    | 4.8 [3.7–5.5] <sup>a</sup>      | 5.5 [3.8–6.4] <sup>a</sup>    | 8.3 [6.3–10.7] <sup>b</sup>   | 0.005           |
| UA/C, mg/mmol                   | 0.4 [0.4–1.1]                   | 0.9 [0.4–1.7]                 | 3.5 [0.8–59.0]                | 0.101           |
| Uric acid, mmol/L               | 252 [217–298]                   | 319 [261–449]                 | 390 [322–635]                 | 0.063           |
| Proteins intake, g/kg/day       | 1.02 [0.87–1.40]                | 0.82 [0.70–0.82]              | 0.97 [0.77–1.08]              | 0.218           |
| Bicarbonates, mmol/L            | 24 [22–25]                      | 25 [24–26]                    | 26 [23–34]                    | 0.277           |
| Proteins, g/L                   | 71 [70–74]                      | 72 [70–75]                    | 69.5 [65.3–72.8]              | 0.218           |
| Triglycerides, mmol/L           | 0.94 [0.81–1.35] <sup>a,b</sup> | 0.92 [0.83–1.88] <sup>a</sup> | 2.12 [1.54–3.18] <sup>b</sup> | 0.025           |
| Total cholesterol, mmol/L       | 4.11 [3.92–4.79]                | 5.42 [4.19–5.90]              | 4.83 [3.76–5.42]              | 0.205           |
| HDL-cholesterol, mmol/L         | 1.08 [0.98–1.97]                | 1.18 [1.07–1.68]              | 0.92 [0.79–1.31]              | 0.221           |
| LDL-cholesterol, mmol/L         | 2.76 [2.24–2.90]                | 3.49 [2.40–4.08]              | 2.90 [1.99–3.50]              | 0.244           |
| Lipid Lowering treatments, %    | 0.0                             | 5.3                           | 55.5                          | 0.076           |

Data are expressed as medians [interquartile range] and compared with a Kruskal-Wallis test. Categorical data were compared using Fisher’s exact test. BMI: body mass index; CKD: chronic kidney disease; CRP: C-reactive protein; CV: cardiovascular; mGFR: measured glomerular filtration rate; RAA: renin angiotensin aldosterone; UA/C: urinary albumin/creatinine ratio. Different letters indicate a significant difference between groups ( $p < 0.05$ ).

**Table S3.** mGFR and renal excretion of uric acid, choline, betaine and carnitine.

| Variable                    | Parameter | mGFR,<br>mL/min/<br>1.73 m <sup>2</sup> | FR <sub>Na</sub><br>% | pUric acid<br>μmol/L | Cl <sub>Uric acid</sub>       |                              | pCholine<br>μmol/L | Cl <sub>Choline</sub>             |                            |
|-----------------------------|-----------|-----------------------------------------|-----------------------|----------------------|-------------------------------|------------------------------|--------------------|-----------------------------------|----------------------------|
|                             |           |                                         |                       |                      | mL/mi<br>n/1.73m <sup>2</sup> | FE <sub>Uric acid</sub><br>% |                    | mL/mi<br>n/1.73<br>m <sup>2</sup> | FE <sub>Choline</sub><br>% |
| Controls<br><i>n</i> = 5    | median    | 98                                      | 99.4                  | 252                  | 9                             | 9                            | 1.2                | 3                                 | 3                          |
|                             | IQR       | [91–105]                                | [98.8–99.6]           | [217–298]            | [7–12]                        | [8–13]                       | [1.0–1.4]          | [1–8]                             | [2–8]                      |
| CKD                         |           |                                         |                       |                      |                               |                              |                    |                                   |                            |
| stages 1–2<br><i>n</i> = 19 | median    | 73                                      | 99.4                  | 319                  | 6                             | 8                            | 1.3                | 2                                 | 3                          |
|                             | IQR       | [67–79]                                 | [99.0–99.7]           | [261–449]            | [4–11]                        | [6–15]                       | [1.2–1.5]          | [1–4]                             | [2–5]                      |
| CKD                         |           |                                         |                       |                      |                               |                              |                    |                                   |                            |
| stages 3–5<br><i>n</i> = 8  | median    | 51                                      | 99.1                  | 390                  | 5                             | 9                            | 1.9                | 3                                 | 7                          |
|                             | IQR       | [46–55]                                 | [97.9–99.5]           | [322–635]            | [3–7]                         | [7–15]                       | [1.5–2.1]          | [2–5]                             | [3–10]                     |
| <i>p</i> -value             |           | <0.0001                                 | 0.401                 | 0.063                | 0.117                         | 0.262                        | 0.005              | 0.796                             | 0.172                      |
| Controls<br><i>n</i> = 5    | median    | 98                                      | 99.4                  | 29.9                 | 2                             | 2                            | 40.2               | 2                                 | 1                          |
|                             | IQR       | [91–105]                                | [98.8–99.6]           | [14.8–46.3]          | [2–4]                         | [2–4]                        | [30.8–47.3]        | [1–3]                             | [1–3]                      |
| CKD                         |           |                                         |                       |                      |                               |                              |                    |                                   |                            |
| stages 1–2<br><i>n</i> = 19 | median    | 73                                      | 99.4                  | 32.8                 | 1                             | 2                            | 40.8               | 2                                 | 3                          |
|                             | IQR       | [67–79]                                 | [99.0–99.7]           | [27.3–38.4]          | [1–6]                         | [1–8]                        | [35.7–44.3]        | [1–3]                             | [1–4]                      |
| CKD                         |           |                                         |                       |                      |                               |                              |                    |                                   |                            |
| stages 3–5<br><i>n</i> = 8  | median    | 51                                      | 99.1                  | 29.0                 | 4                             | 8                            | 60.3               | 2                                 | 4.0                        |
|                             | IQR       | [46–55]                                 | [97.9–99.5]           | [15.4–36.3]          | [1–12]                        | [3–23]                       | [36.7–67.8]        | [1–3]                             | [2.3–5.0]                  |
| <i>p</i> -value             |           | <0.001                                  | 0.401                 | 0.365                | 0.543                         | 0.079                        | 0.174              | 0.983                             | 0.145                      |

Data are expressed as medians [interquartile range] and compared with a Kruskal-Wallis test. Abbreviations: CKD: chronic kidney disease; Cl: clearance; FE: fraction of excretion; FR: fraction of reabsorption; IQR: interquartile range; mGFR: measured glomerular filtration rate; p: plasma; TMAO: trimethylamine-N-oxide.

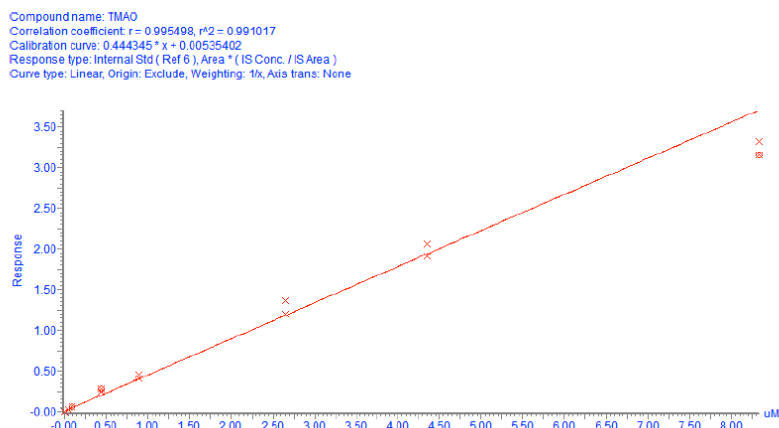

Figure S1. Typical calibration curve of TMAO in LC-MS/MS.

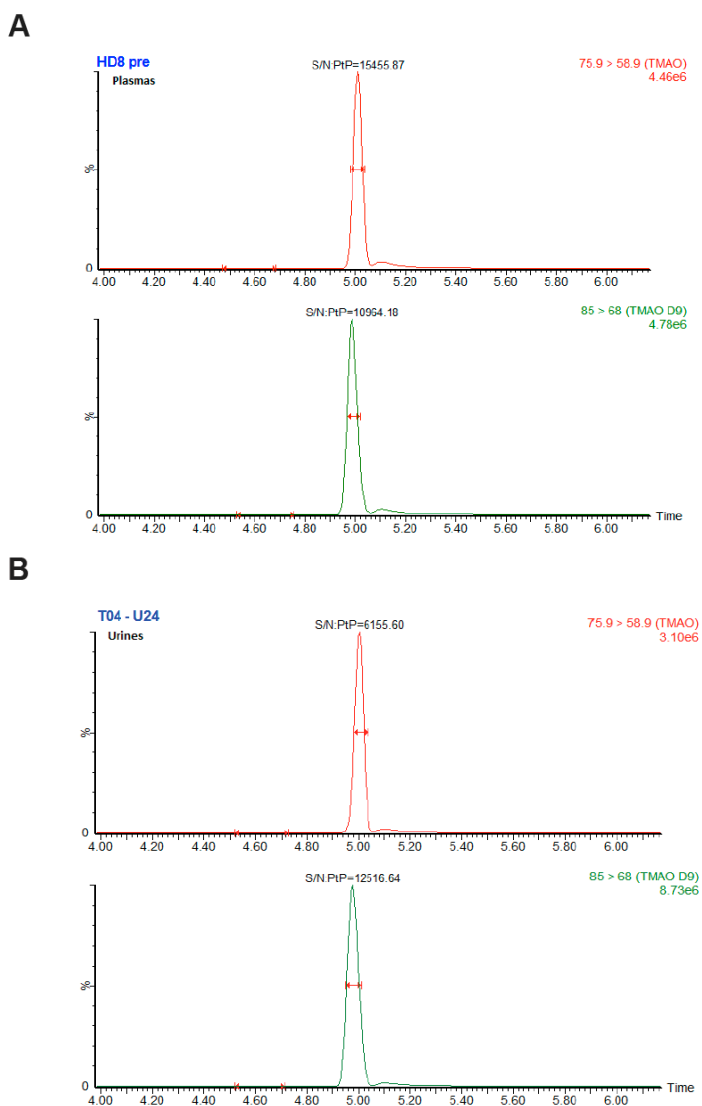

Figure S2. Representative LC-MS/MS chromatograms of TMAO in plasma (A) and urine (B). The deuterated standard (TMAO D9) is presented in green (lower panel).

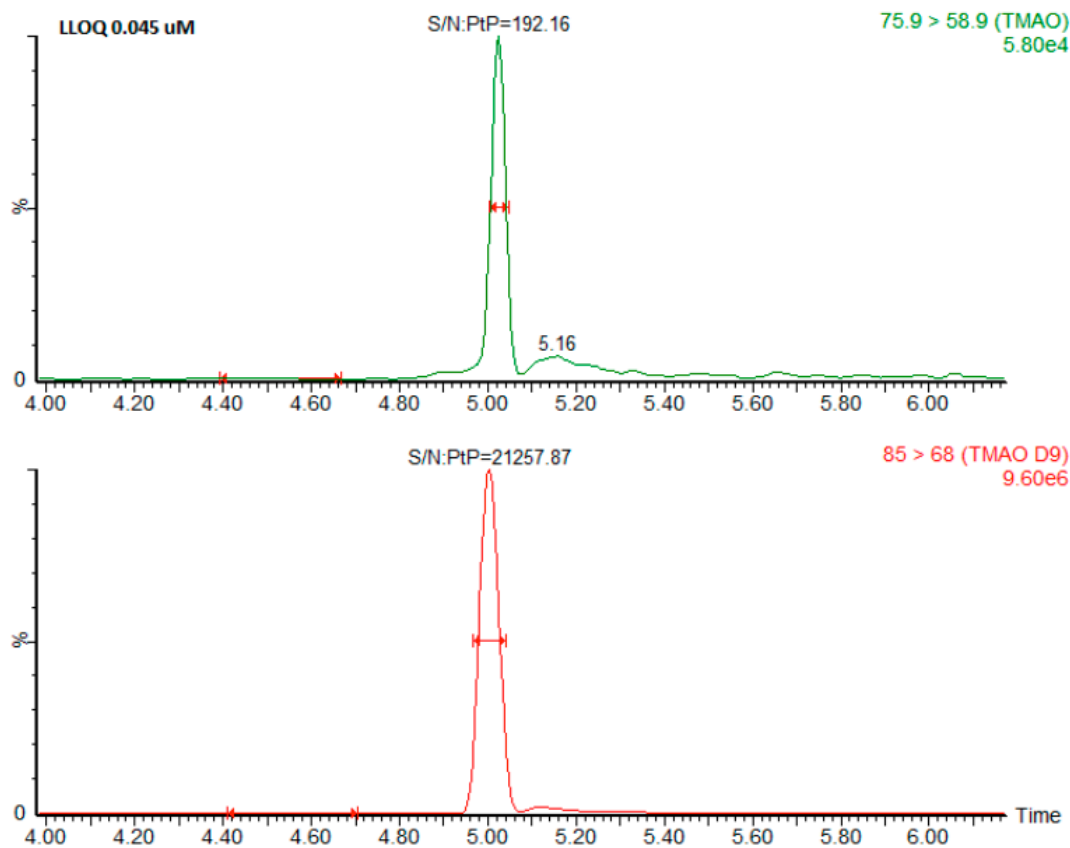

**Figure S3.** Representative LC-MS/MS chromatograms of TMAO at the lower limit of quantification (LLOQ). The deuterated standard (TMAO D9) is presented in red (lower panel).
